# Supplementary material
Source: MDPI journal article supplement (https://www.mdpi.com/1424-8247/16/11/1627)
Supplement: s1 [file s1]

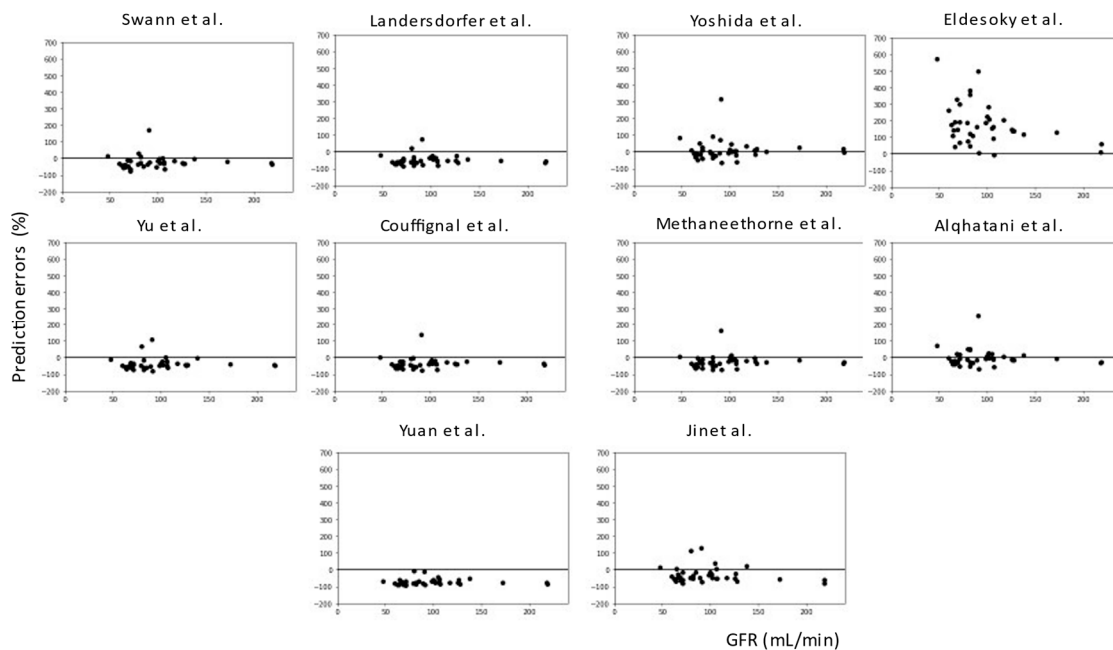

Supplementary **Figure S1**. Prediction errors (%) versus GFR (mL/min) of the 10 published popPK models on the literature dataset.

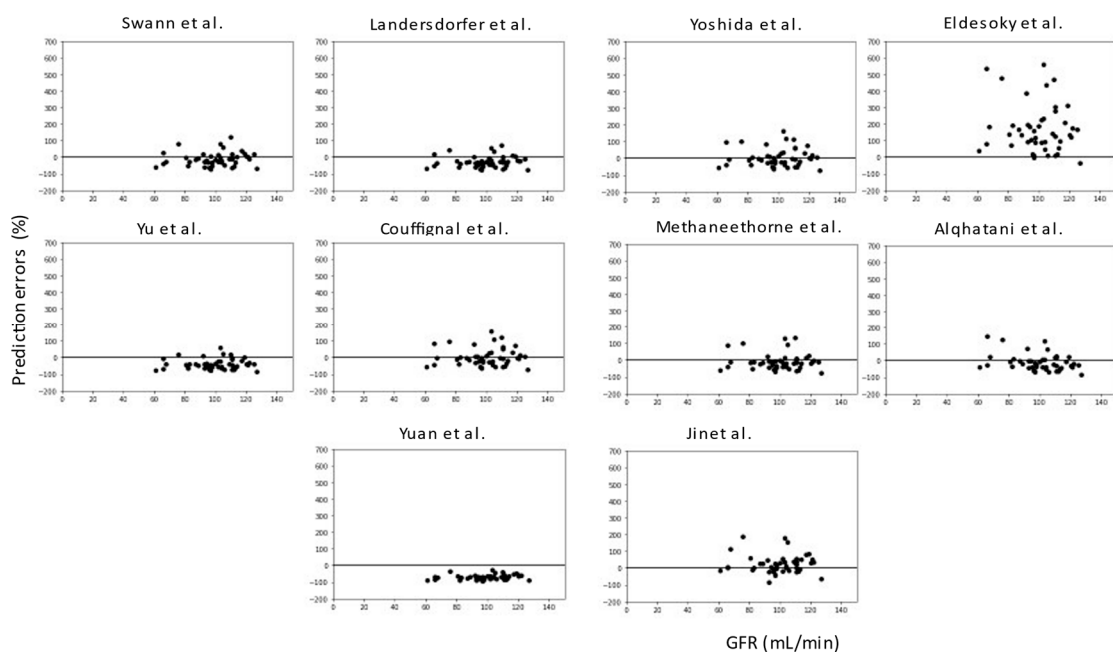

Supplementary **Figure S2**. Prediction errors (%) versus GFR (mL/min) of the 10 published popPK models on the clinical dataset.
